# Supplementary material
Source: PubMed Central journal article supplement (PMC4860829)
Supplement: celldisc20151-s2.pdf [file celldisc20151-s2.pdf]

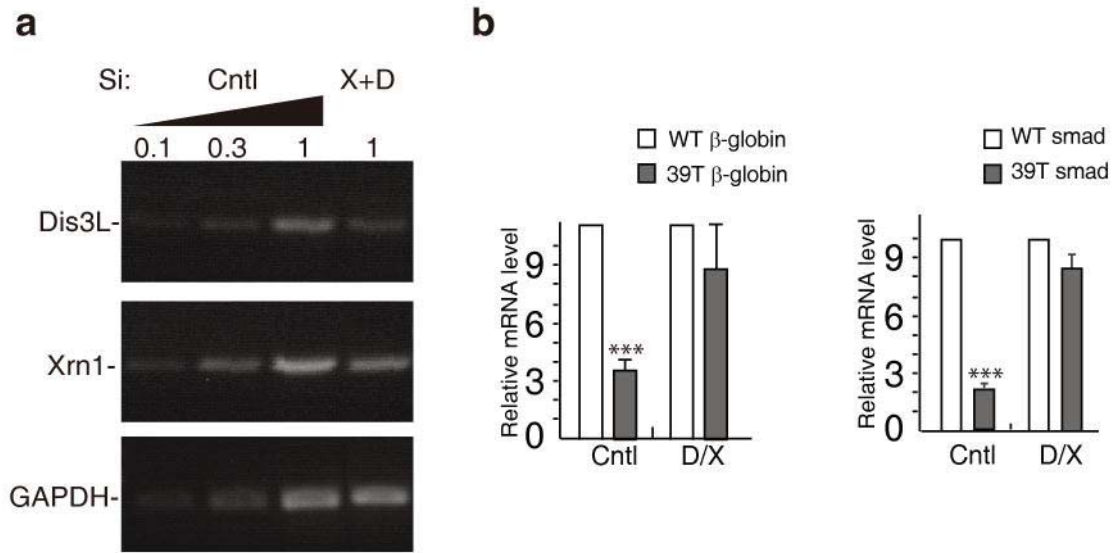

**Figure S2. Xrn1 and Dis3L co-knockdown rescued decay of PTC mRNAs.** (a) Xrn1

and Dis3L siRNA or non-targeting siRNAs were transiently transfected into HeLa cells,

and 48 hrs post-transfection, WT or 39T Smad construct was co-transfected with GFP

into these knockdown cells. 24 hrs after transfection, RNAs were extracted followed by

RT-PCR using indicated primers. The knockdown efficiencies of Xrn1 and Dis3L were

detected by RT-PCR. (b) The ratio of mRNA levels of  $\beta$ -globin and Smad to GFP was

quantified and indicated by the bars. Error bars indicate the standard errors from three

independent experiments. Statistical analysis was performed using the Student's t test.

\* $P < 0.05$ ; \*\* $P < 0.01$ ; \*\*\* $P < 0.001$ .
