# Supplementary material
Source: PubMed Central journal article supplement (PMC4860829)
Supplement: celldisc20151-s3.pdf [file celldisc20151-s3.pdf]

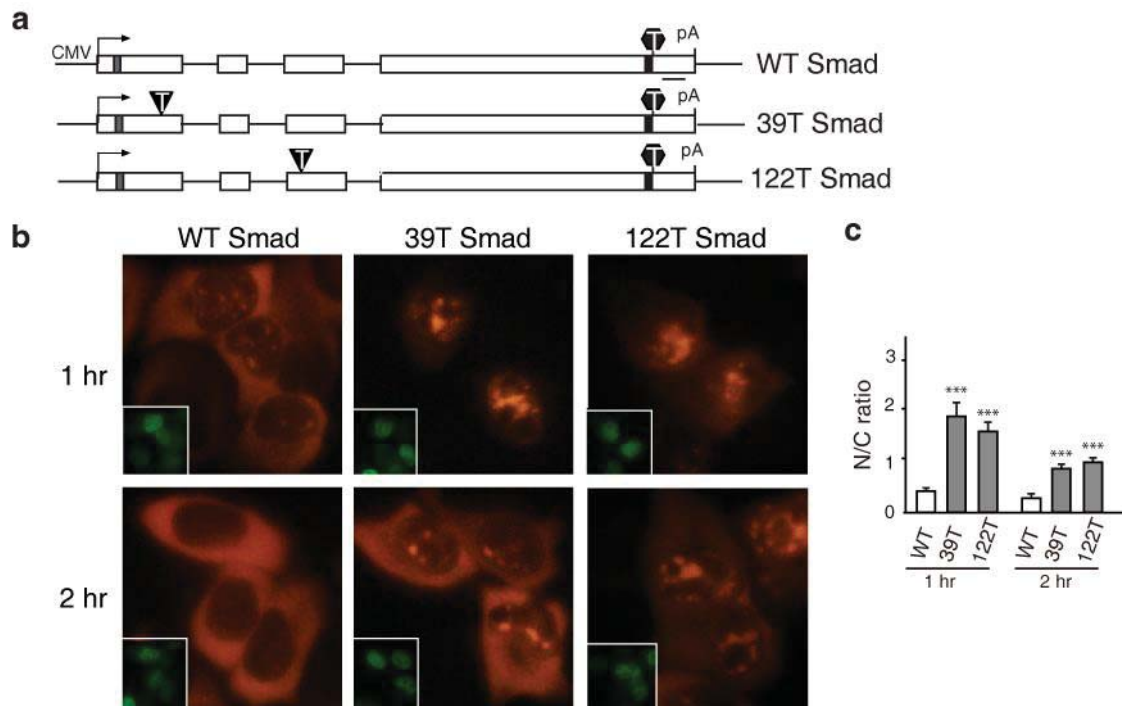

**Figure S3. Prolonged Retention of PTC+ Smad mRNAs in the Nucleus, related to**

**Figure 1.** (a) Schematic of Smad constructs. The CMV promoter and BGH polyA sites and the location of the FISH probe (indicated by short line) are shown. The grey and black bars indicate Myc and HA tag respectively. The black triangle and hexagon indicate PTC and physiological stop codon respectively. (b) Equal amount of Smad constructs (50 ng/ $\mu$ l) were microinjected into nuclei of HeLa cell, and  $\alpha$ -amanitin was added to block transcription 15 min after microinjection. FISH of Smad transcripts was carried out at indicated times after addition of  $\alpha$ -amanitin. FITC-conjugated dextran was co-injected as an injection marker. (c) The graph shows the average N/C ratios for Smad mRNAs, and error bars indicate the standard errors among three independent experiments. Statistical analysis was performed using the Student's t test. \* $P < 0.05$ ; \*\* $P < 0.01$ ; \*\*\* $P < 0.001$ .
