# Supplementary material
Source: PubMed Central journal article supplement (PMC4860829)
Supplement: celldisc20151-s4.pdf [file celldisc20151-s4.pdf]

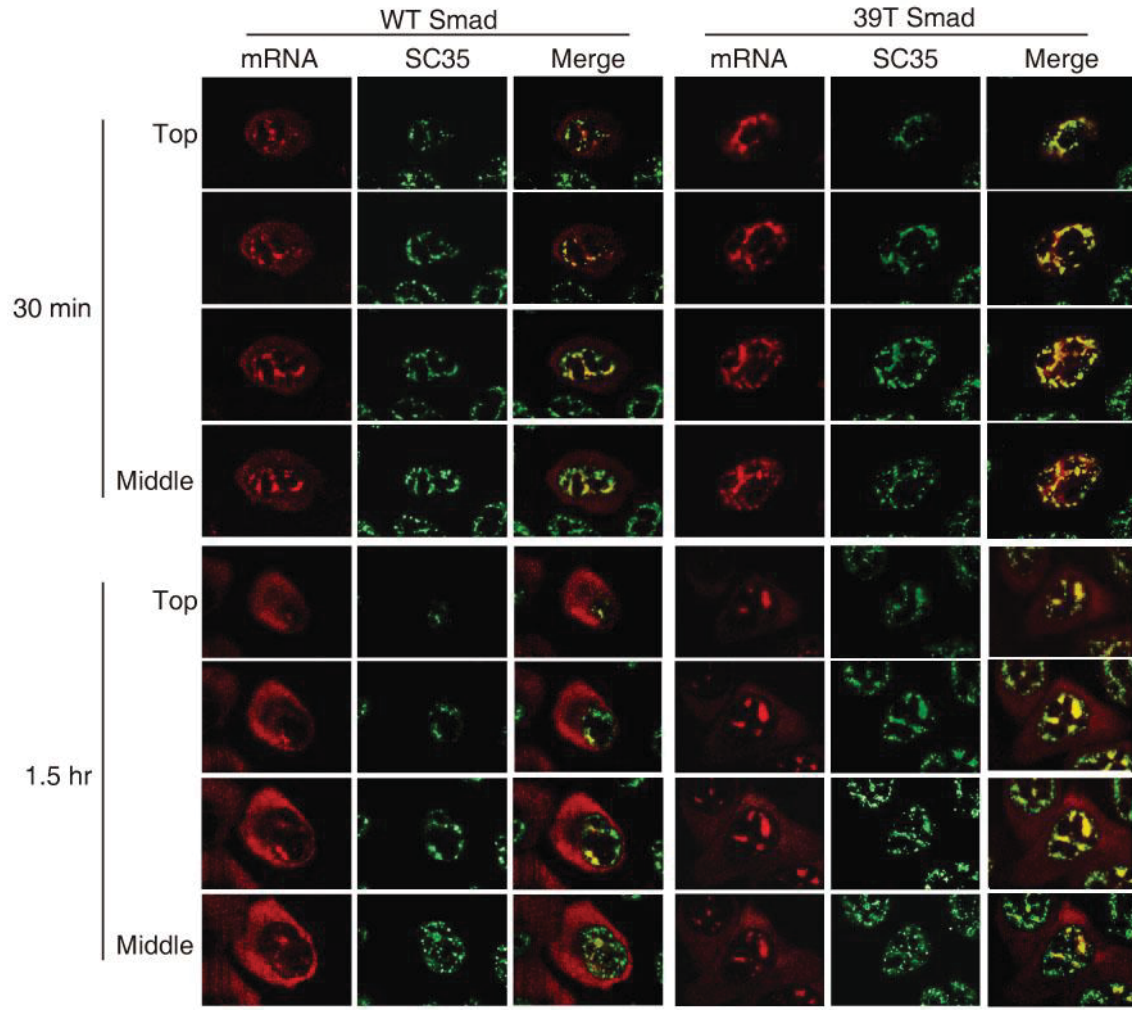

**Figure S4. Z-Stack Confocal Analysis of WT and PTC+ mRNAs and SC35, related to Figure 1.** Equal amount of Smad constructs (50 ng/ $\mu$ l) were microinjected into nuclei of HeLa cell, and  $\alpha$ -amanitin was added 15 mins after microinjection. FISH of Smad transcripts was carried out at indicated time after addition of  $\alpha$ -amanitin. Confocal microscopy was used to visualize the cells. Z-stacks were taken in steps of micrometer. The top to middle sections of the Z-stacks are shown. Scale bar, 10  $\mu$ m.
