# Supplementary material
Source: PubMed Central journal article supplement (PMC4860829)
Supplement: celldisc20151-s5.pdf [file celldisc20151-s5.pdf]

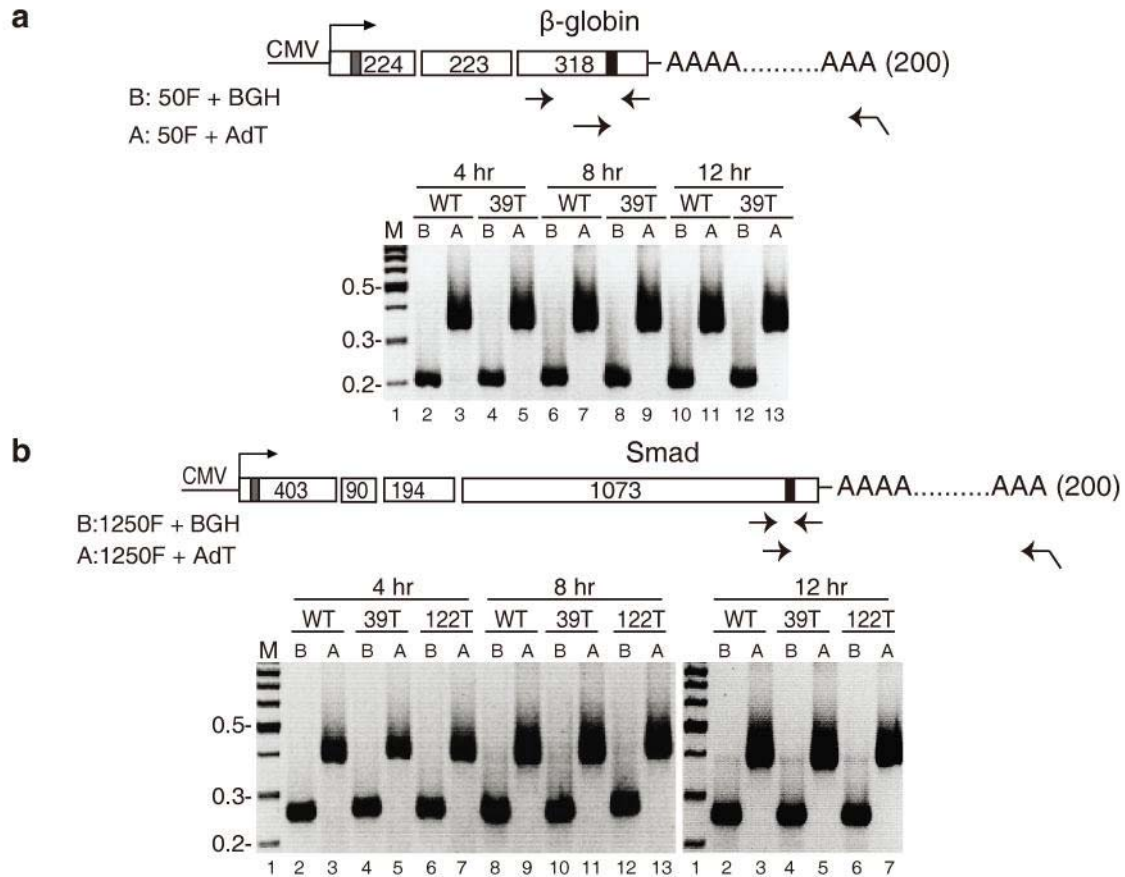

**Figure S5. PTC+  $\beta$ -globin and Smad mRNAs Do Not Have Processing Defects,**

**related to Figure 3.** (a) WT and PTC+  $\beta$ -globin constructs were transfected into HeLa cells. Total RNA was extracted at 4 hrs, 8 hrs and 12 hrs post-transfection and reverse transcription was carried out with an oligo (dT) primer linked to a G/C-rich anchor sequence. PCRs were performed using the indicated primers. (b) Same as (a), except that WT and PTC+ Smad constructs were transfected, and PCRs were carried out using the indicated primers.
