# Supplementary material
Source: PubMed Central journal article supplement (PMC4860829)
Supplement: celldisc20151-s8.pdf [file celldisc20151-s8.pdf]

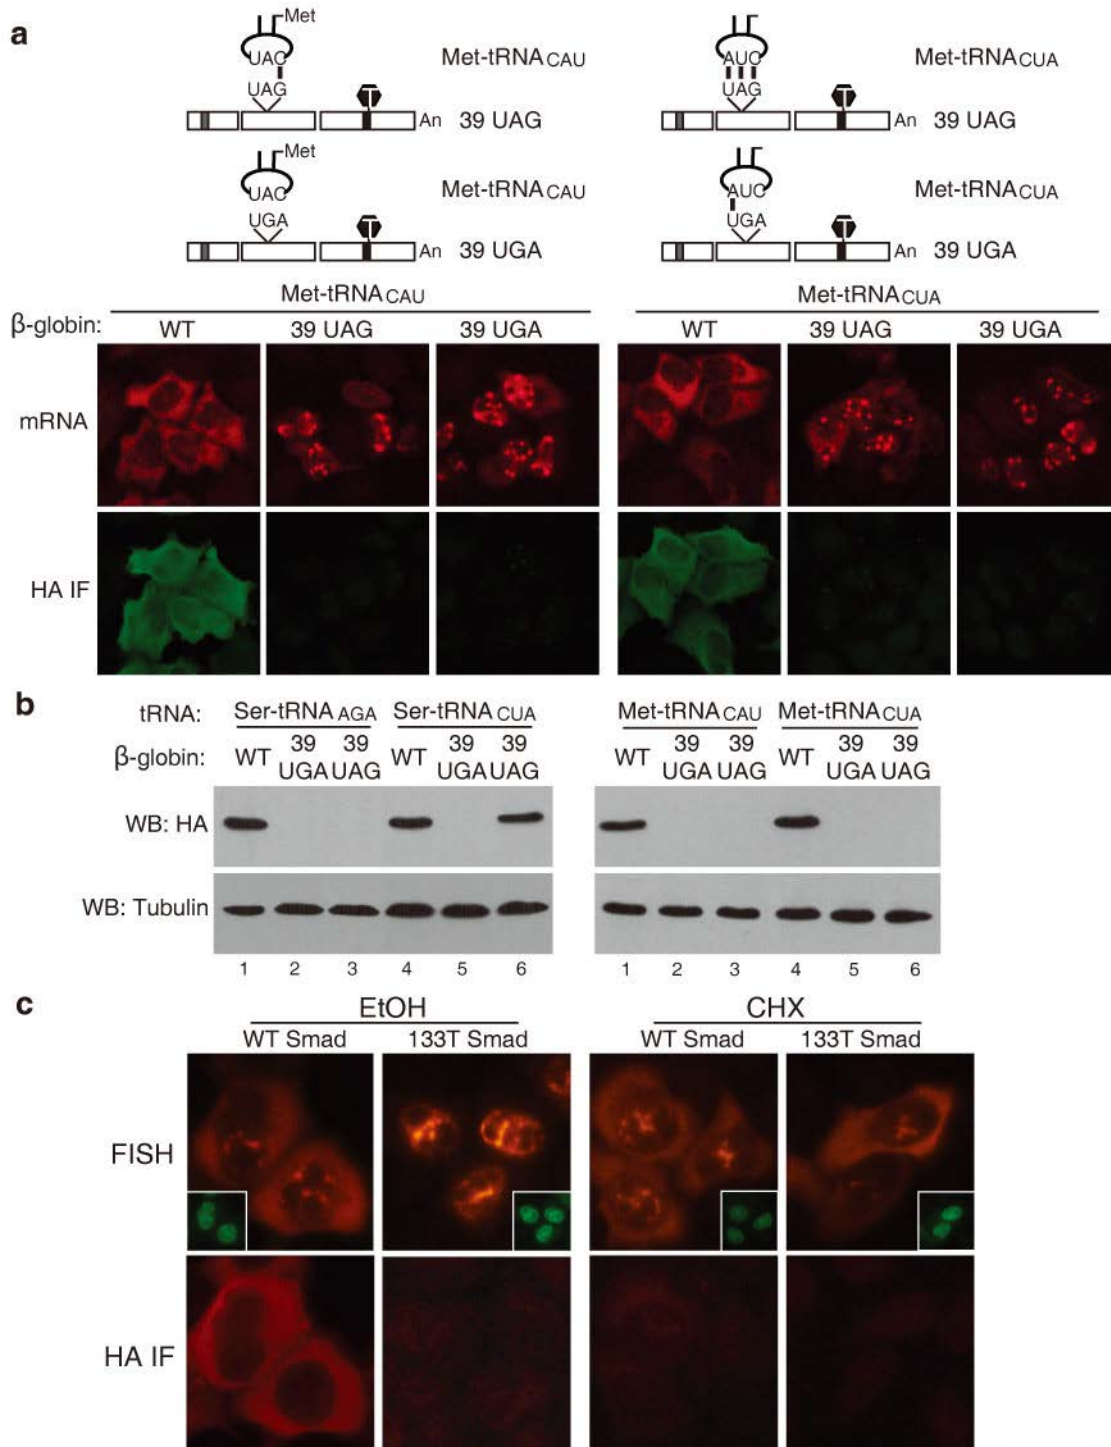

**Figure S8. The Ribosome and tRNA Are Involved in Nuclear PTC Recognition**

(related to Figure 6). (a) Schematic of Met-tRNA constructs whose anticodon either base pair or does not base pair with the PTC. Equal amount of WT and mutant Met-tRNA

constructs were co-transfected with WT or PTC+  $\beta$ -globin constructs into HeLa cells, 12 hrs later, FISH and immunofluorescence with the HA antibody were carried out. (b) Same as (a), except that 12 hrs post-transfection, cells were lysed and lysates were used for western blots with antibodies to HA and Tubulin. (c) HeLa cells were treated with cycloheximide (CHX; 30  $\mu$ g/ml) or ethanol, which was used to dissolve CHX, for 2 hrs before microinjection with Smad constructs.  $\alpha$ -amanitin was added 15 mins after microinjection and 1 hr later, FISH and immunofluorescence with anti-HA antibody were carried out. Insets show the injection marker.
