# Supplementary material
Source: PubMed Central journal article supplement (PMC4860829)
Supplement: celldisc20151-s9.pdf [file celldisc20151-s9.pdf]

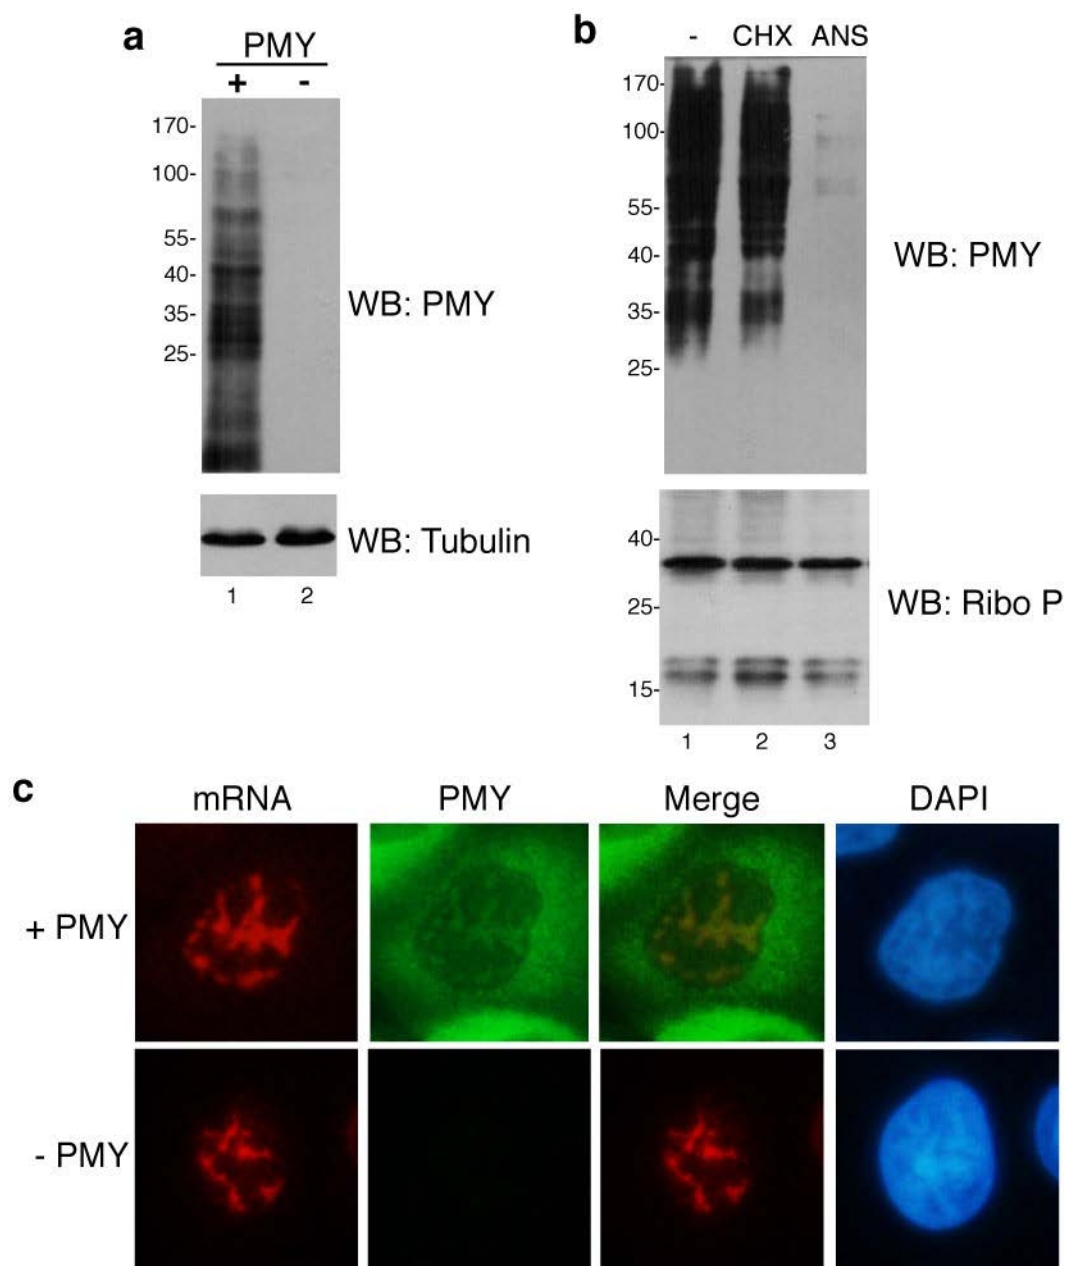

**Figure S9. PMY Is Incorporated into the Nascent Peptide Chain.** (a) HeLa cells were treated with PMY and emetine (+PMY) or emetine only (-PMY) for 5 mins. Cells were then collected followed by western blot with anti-PMY and anti-tubulin antibodies. (b) HeLa cells were pretreated or not pretreated (-) with cycloheximide (CHX) or anisomycin (ANS) for 15 mins followed by PMY and emetine treatment for 5 mins. Cells

were then collected for western blot with anti-PMY and anti-Ribo P antibodies. (c) WT  $\beta$ -globin DNA construct was microinjected into the nuclei of HeLa cells, and 35 mins later, cells were treated with PMY and emetine (+PMY) or emetine only (-PMY) for 5 mins at 37 °C. Cells were then treated with digitonin for 2 mins followed by FISH and immunofluorescence with the PMY antibody.
