# Supplementary material
Source: PubMed Central journal article supplement (PMC4860829)
Supplement: celldisc20151-s10.pdf [file celldisc20151-s10.pdf]

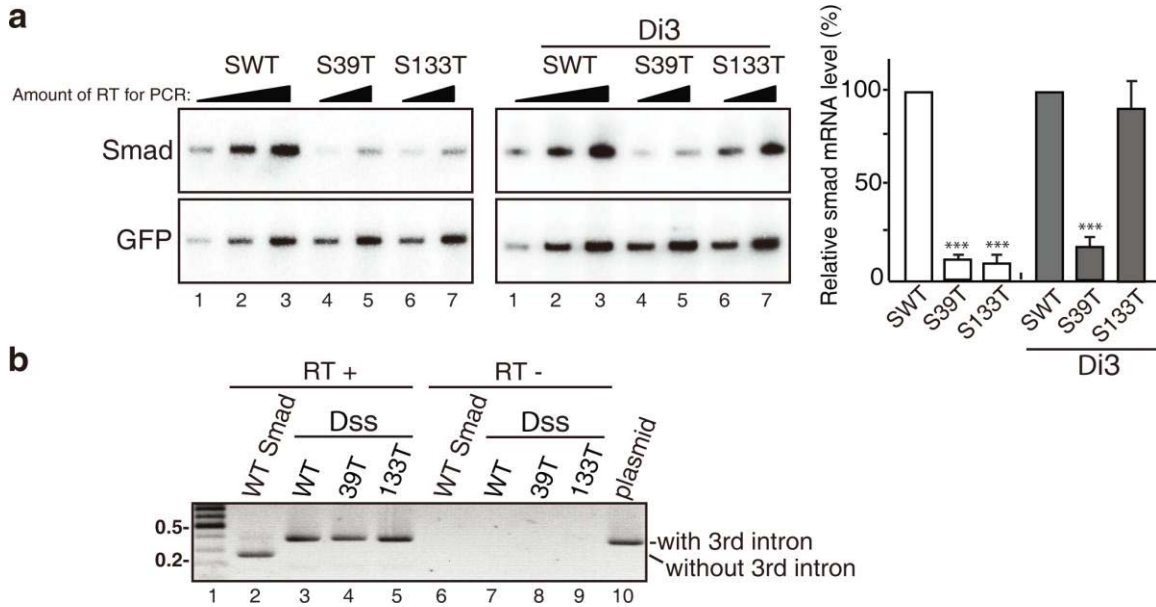

**Figure S10. Deletion of the Downstream Intron Inhibited PTC+ mRNA Degradation,**

**related to Figure 7.** (a) Smad constructs were co-transfected with GFP, and 24 hrs later,

total RNA was extracted followed by RT-PCR using Smad or GFP primers, respectively.

The ratio of mRNA level of Smad to GFP was quantified and indicated by the bars.

Error bars indicate the standard errors from three independent experiments. Statistical

analysis was performed as in Figure 1C. (b) Total RNA was extracted at 12 hr after

transfection of the indicated Smad constructs followed by RT-PCR using primers

complementary to the third and fourth exons. PCR product from the intron-containing

plasmid DNA was used as size a marker for pre-mRNA. The sizes (in kb) of the DNA

marker are indicated.
